# Supplementary material for: scChIX-seq infers dynamic relationships between histone modifications in single cells
Source: PubMed Central journal article supplement (PMC10264247; doi:10.1038/s41587-022-01560-3), 2023-01-02
Supplement: 41587_2022_1560_MOESM1_ESM.pdf [file 41587_2022_1560_MOESM1_ESM.pdf]

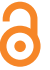

---

# scChIX-seq infers dynamic relationships between histone modifications in single cells

---

In the format provided by the authors and unedited

## Table of Contents

|                                           |                 |
|-------------------------------------------|-----------------|
| <b><u>SUPPLEMENTAL FIGURE 1 .....</u></b> | <b><u>2</u></b> |
|-------------------------------------------|-----------------|

# Supplementary Figure 1

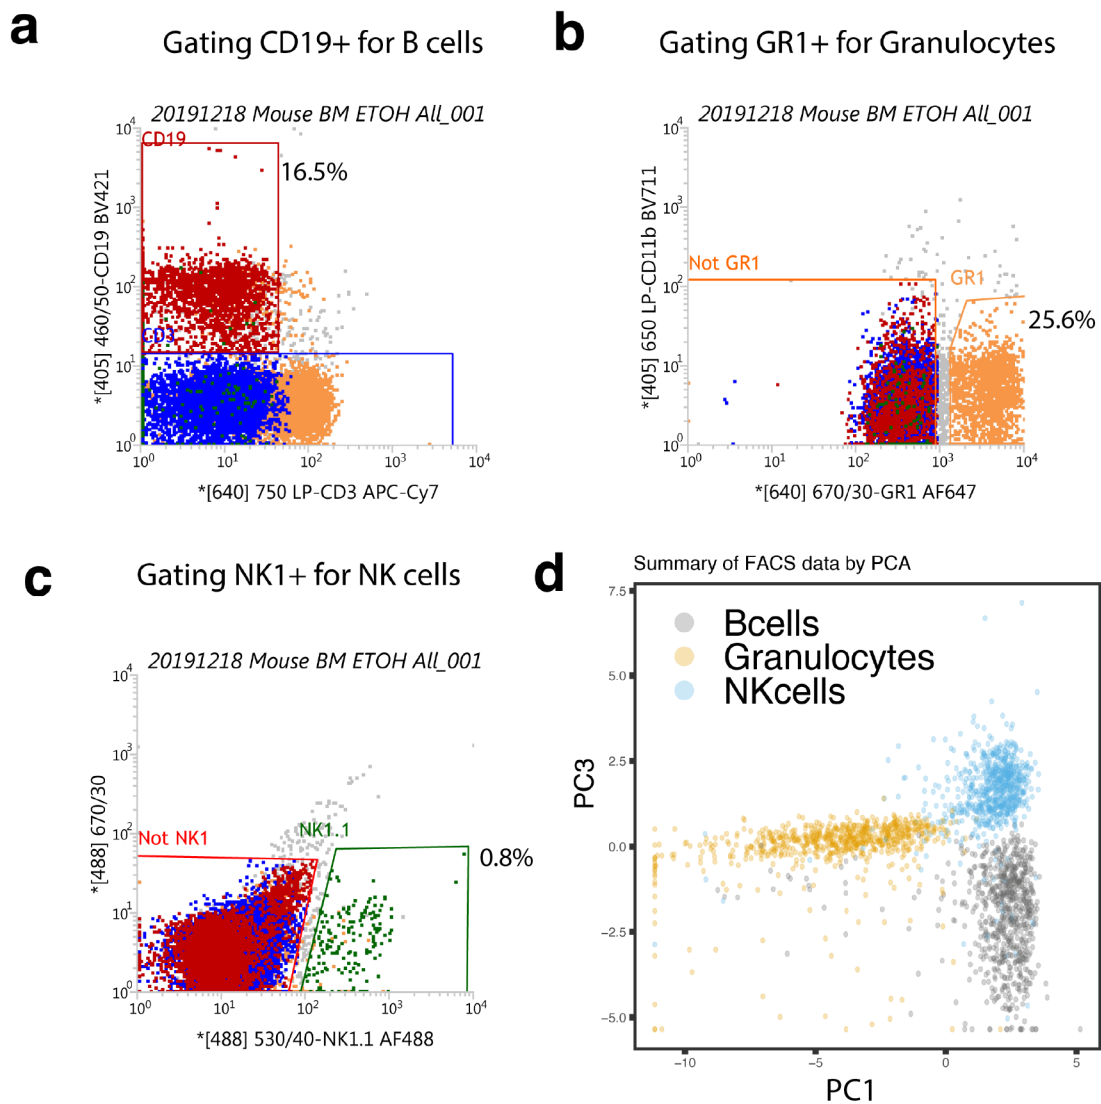

Supplementary Figure 1: fluorescence-activated cell sorting (FACS) gating strategy. **(a)** Gating strategy to purify for B cells by staining for CD19+. **(b)** Gating strategy to purify for granulocytes by staining for GR1+. **(c)** Gating strategy to purify for NK cells by staining for NK1+. **(d)** Summary of the high-dimensional FACS information projected onto principal components 1 and 3, showing separation of the three cell types in FACS space.
